# Supplementary material
Source: publisher figshare collection journal article supplement (https://future-science-group.figshare.com/ndownloader/files/31607261)
Supplement: Supplementary file 1 [file 31607261]

**Supplementary Table 1. The many faces of Chronic Coronary Syndromes**

| - Underlying physiopathology   - With w/out epicardial coronary stenosis |
| --- |
| - Clinical profile   - With w/out myocardial ischemia     - With w/out angina symptoms     - With w/out medical treatment     - With w/out revascularization       - Complete, incomplete or impossible revascularization   - Hemodynamic profile (blood pressure/heart rate)   - Comorbidities   - Risk scores for future events |
